# Supplementary material
Source: PubMed Central journal article supplement (PMC3076200)
Supplement: NIHMS259454-supplement-1.pdf [file NIHMS259454-supplement-1.pdf]

## PROMIS-Cancer Fatigue-17 Short Form

Below is a list of statements that other people with your illness have said are important. **Thinking about the past 7 days, please respond to each question by checking one (1) box.**

|              |                                                                                      | Never<br>1                  | Rarely<br>2                   | Sometimes<br>3             | Often<br>4                   | Always<br>5                |
|--------------|--------------------------------------------------------------------------------------|-----------------------------|-------------------------------|----------------------------|------------------------------|----------------------------|
| FATEXP<br>20 | How often did you feel tired?.....                                                   | <input type="checkbox"/>    | <input type="checkbox"/>      | <input type="checkbox"/>   | <input type="checkbox"/>     | <input type="checkbox"/>   |
| FATEXP<br>6  | How often did you feel tired even when you hadn't done anything?.....                | <input type="checkbox"/>    | <input type="checkbox"/>      | <input type="checkbox"/>   | <input type="checkbox"/>     | <input type="checkbox"/>   |
| FATEXP<br>5  | How often did you experience extreme exhaustion?.....                                | <input type="checkbox"/>    | <input type="checkbox"/>      | <input type="checkbox"/>   | <input type="checkbox"/>     | <input type="checkbox"/>   |
| FATEXP<br>18 | How often did you run out of energy?.....                                            | <input type="checkbox"/>    | <input type="checkbox"/>      | <input type="checkbox"/>   | <input type="checkbox"/>     | <input type="checkbox"/>   |
| FATEXP<br>31 | How often were you energetic?.....                                                   | <input type="checkbox"/>    | <input type="checkbox"/>      | <input type="checkbox"/>   | <input type="checkbox"/>     | <input type="checkbox"/>   |
| FATEXP<br>24 | How often did you have enough energy to enjoy the things you do for fun?.....        | <input type="checkbox"/>    | <input type="checkbox"/>      | <input type="checkbox"/>   | <input type="checkbox"/>     | <input type="checkbox"/>   |
| FATIMP<br>53 | How often were you too tired to take a short walk?                                   | <input type="checkbox"/>    | <input type="checkbox"/>      | <input type="checkbox"/>   | <input type="checkbox"/>     | <input type="checkbox"/>   |
| FATIMP<br>33 | How often did your fatigue limit you at work (include work at home)?.....            | <input type="checkbox"/>    | <input type="checkbox"/>      | <input type="checkbox"/>   | <input type="checkbox"/>     | <input type="checkbox"/>   |
| FATIMP<br>18 | How often did you have to limit your social activities because of your fatigue?..... | <input type="checkbox"/>    | <input type="checkbox"/>      | <input type="checkbox"/>   | <input type="checkbox"/>     | <input type="checkbox"/>   |
| FATIMP<br>29 | How often were you too tired to leave the house?.....                                | <input type="checkbox"/>    | <input type="checkbox"/>      | <input type="checkbox"/>   | <input type="checkbox"/>     | <input type="checkbox"/>   |
| FATIMP<br>30 | How often were you too tired to think clearly?.....                                  | <input type="checkbox"/>    | <input type="checkbox"/>      | <input type="checkbox"/>   | <input type="checkbox"/>     | <input type="checkbox"/>   |
| FATIMP<br>21 | How often were you too tired to take a bath or shower?.....                          | <input type="checkbox"/>    | <input type="checkbox"/>      | <input type="checkbox"/>   | <input type="checkbox"/>     | <input type="checkbox"/>   |
| FATIMP<br>40 | How often did you have enough energy to exercise strenuously?.....                   | <input type="checkbox"/>    | <input type="checkbox"/>      | <input type="checkbox"/>   | <input type="checkbox"/>     | <input type="checkbox"/>   |
| FATIMP<br>6  | How often did your fatigue make you feel slowed down in your thinking?.....          | <input type="checkbox"/>    | <input type="checkbox"/>      | <input type="checkbox"/>   | <input type="checkbox"/>     | <input type="checkbox"/>   |
|              |                                                                                      | <b>Not at<br/>all<br/>1</b> | <b>A little<br/>bit<br/>2</b> | <b>Some<br/>what<br/>3</b> | <b>Quite<br/>a bit<br/>4</b> | <b>Very<br/>much<br/>5</b> |
| FATIMP<br>28 | How hard was it for you to carry on a conversation because of your fatigue?.....     | <input type="checkbox"/>    | <input type="checkbox"/>      | <input type="checkbox"/>   | <input type="checkbox"/>     | <input type="checkbox"/>   |

## PROMIS-Cancer Fatigue Short Form

Below is a list of statements that other people with your illness have said are important. **Thinking about the past 7 days, please respond to each question by checking one (1) box.**

|               |                                                                          | Never<br>1               | Rarely<br>2              | Sometimes<br>3           | Often<br>4               | Always<br>5              |
|---------------|--------------------------------------------------------------------------|--------------------------|--------------------------|--------------------------|--------------------------|--------------------------|
| FATEX<br>P 20 | How often did you feel tired.....                                        | <input type="checkbox"/> |
| FATEX<br>P 5  | How often did you experience extreme exhaustion.....                     | <input type="checkbox"/> |
| FATEX<br>P 18 | How often did you run out of energy.....                                 | <input type="checkbox"/> |
| FATIM<br>P 33 | How often did your fatigue limit you at work (include work at home)..... | <input type="checkbox"/> |
| FATIM<br>P 30 | How often were you too tired to think clearly.....                       | <input type="checkbox"/> |
| FATIM<br>P 21 | How often were you too tired to take a bath or shower.....               | <input type="checkbox"/> |
| FATIM<br>P 40 | How often did you have enough energy to exercise strenuously.....        | <input type="checkbox"/> |

## PROMIS-Cancer Pain Interference Short Form

Below is a list of statements that other people with your illness have said are important. **Thinking about the past 7 days, please respond to each question by checking one (1) box.**

|              |                                                                                          | Never<br>1               | Rarely<br>2              | Sometimes<br>3           | Often<br>4               | Always<br>5              |
|--------------|------------------------------------------------------------------------------------------|--------------------------|--------------------------|--------------------------|--------------------------|--------------------------|
| PAININ<br>46 | How often did pain make it difficult for you to plan social activities?.....             | <input type="checkbox"/> |
| PAININ<br>29 | How often was your pain so severe you could think of nothing else?.....                  | <input type="checkbox"/> |
| PAININ<br>37 | How often did pain make you feel anxious?.....                                           | <input type="checkbox"/> |
| PAININ<br>39 | How often did pain make simple tasks hard to complete?....                               | <input type="checkbox"/> |
| PAININ<br>32 | How often did pain make you feel discouraged?.....                                       | <input type="checkbox"/> |
|              |                                                                                          | Not at all<br>1          | A little<br>bit<br>2     | Some-<br>what<br>3       | Quite a<br>bit<br>4      | Very<br>much<br>5        |
| PAININ<br>5  | How much did pain interfere with your ability to participate in leisure activities?..... | <input type="checkbox"/> |
| PAININ<br>18 | How much did pain interfere with your ability to work (include work at home)?.....       | <input type="checkbox"/> |
| PAININ<br>9  | How much did pain interfere with your day to day activities?.....                        | <input type="checkbox"/> |
| PAININ<br>3  | How much did pain interfere with your enjoyment of life?.....                            | <input type="checkbox"/> |
| PAININ<br>8  | How much did pain interfere with your ability to concentrate?.....                       | <input type="checkbox"/> |

## PROMIS-Cancer Physical Function Short Form

Below is a list of statements that other people with your illness have said are important.  
Please respond to each question by checking one (1) box.

|           |                                                                                                                                               | Without<br>any<br>difficulty<br>5 | With a<br>little<br>difficulty<br>4 | With<br>some<br>difficulty<br>3 | With<br>much<br>difficulty<br>2 | Unable<br>to do<br>1     |
|-----------|-----------------------------------------------------------------------------------------------------------------------------------------------|-----------------------------------|-------------------------------------|---------------------------------|---------------------------------|--------------------------|
| PFA<br>11 | Are you able to do chores such as vacuuming or yard work?.....                                                                                | <input type="checkbox"/>          | <input type="checkbox"/>            | <input type="checkbox"/>        | <input type="checkbox"/>        | <input type="checkbox"/> |
| PFA<br>21 | Are you able to go up and down stairs at a normal pace?.....                                                                                  | <input type="checkbox"/>          | <input type="checkbox"/>            | <input type="checkbox"/>        | <input type="checkbox"/>        | <input type="checkbox"/> |
| PFA<br>56 | Are you able to get in and out of a car?.....                                                                                                 | <input type="checkbox"/>          | <input type="checkbox"/>            | <input type="checkbox"/>        | <input type="checkbox"/>        | <input type="checkbox"/> |
| PFA<br>53 | Are you able to run errands and shop?.....                                                                                                    | <input type="checkbox"/>          | <input type="checkbox"/>            | <input type="checkbox"/>        | <input type="checkbox"/>        | <input type="checkbox"/> |
| PFA<br>9  | Are you able to bend down and pick up clothing from the floor?.....                                                                           | <input type="checkbox"/>          | <input type="checkbox"/>            | <input type="checkbox"/>        | <input type="checkbox"/>        | <input type="checkbox"/> |
| PFB<br>28 | Are you able to lift 10 pounds above your shoulder?.....                                                                                      | <input type="checkbox"/>          | <input type="checkbox"/>            | <input type="checkbox"/>        | <input type="checkbox"/>        | <input type="checkbox"/> |
|           |                                                                                                                                               | Not at all<br>5                   | Very little<br>4                    | Some<br>What<br>3               | Quite a<br>lot<br>2             | Cannot<br>do<br>1        |
| PFB<br>44 | Does your health now limit you in doing moderate activities, such as moving a table, pushing a vacuum cleaner, bowling, or playing golf?..... | <input type="checkbox"/>          | <input type="checkbox"/>            | <input type="checkbox"/>        | <input type="checkbox"/>        | <input type="checkbox"/> |
| PFA<br>1  | Does your health now limit you in doing vigorous activities, such as running, lifting heavy objects, participating in strenuous sports?.....  | <input type="checkbox"/>          | <input type="checkbox"/>            | <input type="checkbox"/>        | <input type="checkbox"/>        | <input type="checkbox"/> |
| PFB<br>3  | Does your health now limit you in putting a trash bag outside?.....                                                                           | <input type="checkbox"/>          | <input type="checkbox"/>            | <input type="checkbox"/>        | <input type="checkbox"/>        | <input type="checkbox"/> |
| PFA<br>6  | Does your health now limit you in bathing or dressing yourself?.....                                                                          | <input type="checkbox"/>          | <input type="checkbox"/>            | <input type="checkbox"/>        | <input type="checkbox"/>        | <input type="checkbox"/> |

## PROMIS-Cancer Anxiety Short Form

Below is a list of statements that other people with your illness have said are important. **Thinking about the past 7 days, please respond to each question by checking one (1) box.**

|                 |                                                            | Never<br>1               | Rarely<br>2              | Sometimes<br>3           | Often<br>4               | Always<br>5              |
|-----------------|------------------------------------------------------------|--------------------------|--------------------------|--------------------------|--------------------------|--------------------------|
| EDANX<br>05     | I felt anxious.....                                        | <input type="checkbox"/> |
| EDANX<br>41     | My worries overwhelmed me.....                             | <input type="checkbox"/> |
| EDANX<br>09     | I had unpleasant thoughts that wouldn't leave my mind..... | <input type="checkbox"/> |
| EDANX<br>27     | I felt something awful would happen.....                   | <input type="checkbox"/> |
| EDANX<br>30     | I felt worried.....                                        | <input type="checkbox"/> |
| EDANX<br>47     | I felt indecisive.....                                     | <input type="checkbox"/> |
| EDANX<br>51     | I had trouble relaxing.....                                | <input type="checkbox"/> |
| EDANX<br>20     | I was easily startled.....                                 | <input type="checkbox"/> |
| EDANX<br>-CaPS6 | I worried that my condition will get worse.....            | <input type="checkbox"/> |

## PROMIS-Cancer Depression Short Form

Below is a list of statements that other people with your illness have said are important. **Thinking about the past 7 days, please respond to each question by checking one (1) box.**

|             |                                                   | Never<br>1               | Rarely<br>2              | Sometimes<br>3           | Often<br>4               | Always<br>5              |
|-------------|---------------------------------------------------|--------------------------|--------------------------|--------------------------|--------------------------|--------------------------|
| EDDEP<br>06 | I felt helpless.....                              | <input type="checkbox"/> |
| EDDEP<br>09 | I felt that nothing could cheer me up.....        | <input type="checkbox"/> |
| EDDEP<br>16 | I felt like crying.....                           | <input type="checkbox"/> |
| EDDEP<br>17 | I felt sad.....                                   | <input type="checkbox"/> |
| EDDEP<br>22 | I felt like a failure.....                        | <input type="checkbox"/> |
| EDDEP<br>39 | I felt I had no reason for living.....            | <input type="checkbox"/> |
| EDDEP<br>41 | I felt hopeless.....                              | <input type="checkbox"/> |
| EDDEP<br>28 | I felt lonely.....                                | <input type="checkbox"/> |
| EDDEP<br>05 | I felt that I had nothing to look forward to..... | <input type="checkbox"/> |
| EDDEP<br>33 | I thought about suicide.....                      | <input type="checkbox"/> |
